# Supplementary material for: Weighted fidelity of delivery of an intervention in the health facility: a case of TB screening among PLHIV in selected hospitals in Ghana
Source: Research Square preprint supplement (doi:10.21203/rs.3.rs-1439056/v1), 2022-03-17
Supplement: Supplementary file 1 [file 3af4f6dabab48c62f7928a99.docx]

**Table 4: Multiple regression analysis for separate fidelities**

| Model | Variable | Measurement | Coef. | 95% CI | p-value |
| --- | --- | --- | --- | --- | --- |
| 1. Provider level | Provider fidelity |  | 98.58 | 56.90 - 139.42 | 0.000 |
| Ecological zone | Savannah | Ref |  |  |
| Forest | 4.38 | -10.99 - 19.75 | 0.553 |
| Coastal | 12.57 | -6.46 - 31.61 | 0.180 |
| TB screening tool available | No |  |  |  |
| Yes | 36.97 | 4.94 - 68.99 | 0.027 |
| TB/HIV clinical manual available | No |  |  |  |
| Yes | 1.86 | -25.96 - 29.67 | 0.889 |
| TB screening guideline available | No |  |  |  |
| Yes | -14.65 | -48.01 - 18.71 | 0.364 |
| TB IE&C materials available | No |  |  |  |
| Yes | -1.67 | -35.66 - 32.33 | 0.918 |
| TB prevention and infection control guideline available | No |  |  |  |
| Yes | 0 |  |  |
| Number of HIV healthcare providers per HIV clinic |  | -1.81 | 7.08 - 3.46 | 0.475 |
| Number of PLHIV attending the HIV clinic per month |  | 0.13 | -0.08 - 0.34 | 0.212 |
| Number of PLHIV screened for TB per month |  | -0.03 | -0.06 - 0.01 | 0.120 |
| Number of patients per provider per month |  | 0.02 | 0 - 0.04 | 0.066 |
| 2. Facility level | Provider fidelity |  | 116.66 | -18.11 - 251.43 |  |
| Ecological zone | Savannah | Ref |  |  |
| Forest | -5.14 | -26.94 - 16.65 |  |
| Coastal | -15.15 | -42.41 - 12.11 |  |
| TB screening tool available | No |  |  |  |
| Yes | -4.35 | -58.45 - 49.73 |  |
| TB/HIV clinical manual available | No |  |  |  |
| Yes | -10.63 | -51.21 - 29.95 |  |
| TB screening guideline available | No |  |  |  |
| Yes | -1.05 | -51.85 - 49.74 |  |
| TB IE&C materials available | No |  |  |  |
| Yes | 21.58 | -25.95 - 69.12 |  |
| TB prevention and infection control guideline available | No |  |  |  |
| Yes | 0 |  |  |
| Number of HIV healthcare providers per HIV clinic |  | 2.73 | -5.02 - 10.48 |  |
| Number of PLHIV attending the HIV clinic per month |  | 0.18 | -0.12 - 0.50 |  |
| Number of PLHIV screened for TB per month |  | -0.04 | -0.09 - 0.01 |  |
| Number of patients per provider per month |  | 0.03 | -0.0 - 0.06 |  |
| 3. Weighted level | Provider fidelity |  | 1.98 | 1.35 - 2.60 | 0.000 |
| Ecological zone | Savannah |  |  |  |
| Forest | 5.48 | -7.15 - 18.11 | 0.370 |
| Coastal | 5.45 | -11.04 - 17.94 | 0.619 |
| TB screening tool available | No |  |  |  |
| Yes | 13.45 | -12.26 - 39.16 | 0.282 |
| TB/HIV clinical manual available | No |  |  |  |
| Yes | 1.15 | -21.60 - 23.90 | 0.916 |
| TB screening guideline available | No |  |  |  |
| Yes | -5.42 | -32.85 - 22.01 | 0.679 |
| TB IE&C materials available | No |  |  |  |
| Yes | -6.47 | -34.66 - 21.71 | 0.631 |
| TB prevention and infection control guideline available | No |  |  |  |
| Yes | 0 |  |  |
| Number of HIV healthcare providers per HIV clinic |  | -0.29 | -4.51 - 3.93 | 0.887 |
| Number of PLHIV attending the HIV clinic per month |  | 0.12 | -0.05 - 0.29 | 0.161 |
| Number of PLHIV screened for TB per month |  | -0.02 | -0.05 - 0.00 | 0.102 |
| Number of patients per provider per month |  | 0.01 | -0.00 - 0.03 | 0.144 |
